# Supplementary material for: A noniteratiave approach to modelling moist thermodynamics
Source: Copernicus journal article supplement (doi:10.5194/acp-2017-624), 2017-07-18
Supplement: Supplementary file 1 [file NoniterativePseudoadiabatSolver.xlsx]

## Sheet: T(θw,P)
	NON-ITERATIVE APPROXIMATION OF T(θw,P)
	INPUT					Table I. Optimization coefficients for T(θw,P)
	θw =	-10	saturated adiabat (degrees C), -70C<θw<+40C			Parameter	a20	a19	a18	a17	a16	a15	a14	a13	a12	a11	a10	a9	a8	a7	a6	a5	a4	a3	a2	a1	a0
	P =	100	pressure (kPa), 105kPa<P<1kPa			k0	-4.56619e-49	-1.61539e-46	-2.03009e-44	-6.69228e-43	7.83826e-41	7.65116e-39	7.95779e-38	-1.73544e-35	-7.07302e-34	8.58768e-33	1.0529e-30	1.33338e-29	-4.65826e-28	-1.39183e-26	-7.77654e-26	1.30303e-24	4.95483e-23	1.24497e-21	9.97188e-21	-1.03915e-19	-3.05938e-18
						k1	6.04321e-46	2.14213e-43	2.70229e-41	9.07083e-40	-1.02689e-37	-1.01689e-35	-1.12473e-34	2.27528e-32	9.44756e-31	-1.06685e-29	-1.38506e-27	-1.8171e-26	5.97368e-25	1.82944e-23	1.08147e-22	-1.54954e-21	-6.23536e-20	-1.62987e-18	-1.38806e-17	1.25653e-16	4.11339e-15
						k2	-3.53623e-43	-1.25605e-40	-1.59075e-38	-5.43862e-37	5.94453e-35	5.97623e-33	7.01686e-32	-1.3182e-29	-5.58027e-28	5.82091e-27	8.05321e-25	1.09454e-23	-3.38151e-22	-1.06297e-20	-6.62578e-20	8.07805e-19	3.46036e-17	9.41011e-16	8.47532e-15	-6.67848e-14	-2.44877e-12
	OUTPUT					k3	1.20353e-40	4.28398e-38	5.44763e-36	1.89738e-34	-2.00024e-32	-2.04298e-30	-2.54181e-29	4.4395e-27	1.91729e-25	-1.83313e-24	-2.7226e-22	-3.83331e-21	1.11154e-19	3.59201e-18	2.35364e-17	-2.42729e-16	-1.1147e-14	-3.15293e-13	-2.98805e-12	2.05504e-11	8.49692e-10
	Tc =	-10.0027	ambient temperature (degrees C)			k4	-2.63551e-38	-9.40184e-36	-1.20057e-33	-4.2604e-32	4.32782e-30	4.49394e-28	5.91374e-27	-9.61503e-25	-4.23894e-23	3.68171e-22	5.92084e-20	8.63461e-19	-2.34726e-17	-7.81055e-16	-5.36511e-15	4.64742e-14	2.30764e-12	6.78516e-11	6.73418e-10	-4.05631e-09	-1.90231e-07
						k5	3.876e-36	1.38585e-33	1.77727e-31	6.42602e-30	-6.28503e-28	-6.63942e-26	-9.22278e-25	1.39787e-22	6.29458e-21	-4.91533e-20	-8.64588e-18	-1.30567e-16	3.32415e-15	1.1409e-13	8.19549e-13	-5.91276e-12	-3.20754e-10	-9.79465e-09	-1.01352e-07	5.37018e-07	2.8699e-05
						k6	-3.87322e-34	-1.38808e-31	-1.7879e-29	-6.58601e-28	6.19835e-26	6.66533e-24	9.75286e-23	-1.38027e-20	-6.35125e-19	4.40544e-18	8.57739e-16	1.34086e-14	-3.19448e-13	-1.13284e-11	-8.4915e-11	5.05013e-10	3.03157e-08	9.60111e-07	1.03152e-05	-4.8336e-05	-0.00295294
	Sec 2.5 steps are autofilled below:					k7	2.59442e-32	9.31985e-30	1.20573e-27	4.52402e-26	-4.0956e-24	-4.48541e-22	-6.89767e-21	9.13257e-19	4.29563e-17	-2.60905e-16	-5.70386e-14	-9.22519e-13	2.05545e-11	7.54446e-10	5.88962e-09	-2.8504e-08	-1.92398e-06	-6.3085e-05	-0.000700982	0.00292376	0.204474
	1) Compute kn(θw)					k8	-1.11398e-30	-4.01127e-28	-5.21246e-26	-1.99138e-24	1.73407e-22	1.93485e-20	3.11944e-19	-3.87249e-17	-1.86225e-15	9.73439e-15	2.43154e-12	4.06601e-11	-8.46998e-10	-3.22314e-08	-2.61578e-07	1.0132e-06	7.84807e-05	0.00265846	0.0304407	-0.113885	-9.11161
		k0 =	-1.8922e-18			k9	2.76702e-29	9.98751e-27	1.30354e-24	5.06816e-23	-4.24629e-21	-4.82813e-19	-8.13961e-18	9.49818e-16	4.66986e-14	-2.05616e-13	-5.99746e-11	-1.03598e-09	2.01775e-08	7.97247e-07	6.71473e-06	-2.03565e-05	-0.00185826	-0.0648695	-0.762749	2.59171	237.144
		k1 =	2.62112e-15			k10	-3.0182e-28	-1.092e-25	-1.43141e-23	-5.66008e-22	4.5657e-20	5.29028e-18	9.30052e-17	-1.02306e-14	-5.14154e-13	1.85472e-12	6.49769e-10	1.15819e-08	-2.10996e-07	-8.66731e-06	-7.56282e-05	0.000173918	0.0193999	0.696077	8.38028	-25.9392	-2686.84
		k2 =	-1.60682e-12
		k3 =	5.73651e-10
		k4 =	-1.31991e-07			Table II. θref(P)
		k5 =	2.0437e-05			Coefficient	b20	b19	b18	b17	b16	b15	b14	b13	b12	b11	b10	b9	b8	b7	b6	b5	b4	b3	b2	b1	b0
		k6 =	-0.00215485			value	-1.82818e-32	1.47337e-29	-5.06174e-27	9.2414e-25	-8.29676e-23	-2.60625e-22	8.8672e-19	-7.61444e-17	-2.56965e-15	1.1557e-12	-1.28675e-10	8.68903e-09	-4.0577e-07	1.36532e-05	-0.000334635	0.00594684	-0.0754918	0.670511	-4.12445	19.9877	38.3534
		k7 =	0.152646
		k8 =	-6.94641
		k9 =	184.528
		k10 =	-2124.62
	2) Compute θref (P )
		θref =	202.327
	3) Compute T(θref )
		Tk =	263.157
		Tc =	-10.0027

## Sheet: θw(T,P)
	NON-ITERATIVE APPROXIMATION OF θw(T,P)
	INPUT					Table III. Optimization coefficients for θw(T,P)
	T =	10	temperature (degrees C), -100<T<+40			Parameter	α20	α19	α18	α17	α16	α15	α14	α13	α12	α11	α10	α9	α8	α7	α6	α5	α4	α3	α2	α1	α0
	P =	100	pressure (kPa), 105<P<1			κ0	-9.39088e-52	-5.90857e-49	-1.5478e-46	-2.08938e-44	-1.31876e-42	8.95226e-42	7.09171e-39	3.75686e-37	-3.71722e-36	-1.02268e-33	-2.41723e-32	8.89967e-31	4.46961e-29	-2.23317e-29	-2.71806e-26	-3.26674e-25	4.31566e-24	1.48216e-22	-7.58998e-22	-9.37079e-21	1.22647e-18
						κ1	-3.17266e-49	-1.99249e-46	-5.2069e-44	-7.00299e-42	-4.38379e-40	3.43363e-39	2.38854e-36	1.24508e-34	-1.35314e-33	-3.42553e-31	-7.88056e-30	3.01833e-28	1.48245e-26	-1.14024e-26	-9.21269e-24	-1.07112e-22	1.70444e-21	4.47065e-20	-3.29874e-19	2.14116e-19	4.29844e-16
						κ2	-3.75343e-47	-2.34875e-44	-6.10894e-42	-8.15724e-40	-5.02403e-38	4.97322e-37	2.8081e-34	1.41909e-32	-1.8137e-31	-3.9884e-29	-8.69896e-28	3.60692e-26	1.69347e-24	-2.50147e-24	-1.08947e-21	-1.1644e-20	2.37423e-19	4.29946e-18	-4.6516e-17	5.50272e-16	5.74031e-14
	OUTPUT					κ3	-1.42137e-45	-8.77986e-43	-2.24452e-40	-2.91782e-38	-1.68659e-36	3.0787e-35	1.03907e-32	4.66833e-31	-9.62253e-30	-1.42935e-27	-2.491e-26	1.4262e-24	5.63274e-23	-2.75386e-22	-4.03813e-20	-2.856e-19	1.19904e-17	6.10499e-17	-2.45628e-15	8.40082e-14	3.54512e-12
	θw =	9.99872	moist adiabat (degrees C)			κ4	5.03955e-44	3.25158e-41	8.79038e-39	1.24099e-36	8.57373e-35	3.3591e-34	-3.97591e-31	-2.4918e-29	1.41762e-29	5.99403e-26	1.82855e-24	-4.22831e-23	-2.91638e-21	-1.35749e-20	1.58391e-18	2.9486e-17	-1.45001e-16	-1.31674e-14	3.10892e-15	6.4051e-12	9.04858e-11
						κ5	4.68077e-42	2.94359e-39	7.70483e-37	1.03844e-34	6.5266e-33	-4.78131e-32	-3.52564e-29	-1.84474e-27	1.94207e-26	5.02204e-24	1.16673e-22	-4.32609e-21	-2.18873e-19	-3.43119e-20	1.39749e-16	1.70651e-15	-3.07546e-14	-6.54764e-13	5.49994e-12	3.59819e-10	3.03925e-09
						κ6	3.33977e-41	1.9641e-38	4.68073e-36	5.38783e-34	2.13147e-32	-1.69949e-30	-2.18371e-28	-4.79806e-27	4.44925e-25	2.53513e-23	-1.0251e-22	-3.64289e-20	-6.24435e-19	2.01011e-17	8.45214e-16	-3.02206e-15	-5.25778e-13	-1.91647e-12	2.70891e-10	2.35798e-08	4.90644e-07
	Sec 2.5 steps are autofilled below:					κ7	-3.39128e-39	-2.16068e-36	-5.74908e-34	-7.93231e-32	-5.23121e-30	8.38861e-30	2.62433e-26	1.49875e-24	-8.29812e-24	-3.83663e-21	-1.02155e-19	3.00837e-18	1.75946e-16	4.24728e-16	-1.03444e-13	-1.42155e-12	1.31619e-11	2.25884e-10	1.73068e-08	1.11134e-06	6.1648e-05
	1) Compute κn(T)					κ8	-4.19061e-38	-2.5933e-35	-6.64364e-33	-8.66064e-31	-5.03906e-29	8.62435e-28	3.03892e-25	1.368e-23	-2.74147e-22	-4.08796e-20	-7.1124e-19	3.95458e-17	1.56518e-15	-6.72155e-15	-1.0276e-12	-5.61348e-12	-1.59858e-12	-6.41456e-09	8.59034e-07	6.08005e-05	0.00259706
		κ0 =	1.19318e-18			κ9	5.99068e-37	3.87647e-34	1.05108e-31	1.48789e-29	1.02916e-27	3.64474e-27	-4.84021e-24	-3.01954e-22	3.52987e-22	7.41069e-19	2.24498e-17	-5.50179e-16	-3.8165e-14	-1.18316e-13	2.7959e-11	2.96695e-10	-2.10825e-08	-2.95372e-07	8.04131e-05	0.00124963	0.326304
		κ1 =	4.42383e-16			κ10	3.90253e-36	2.46862e-33	6.50343e-31	8.82165e-29	5.56083e-27	-4.75157e-26	-3.12948e-23	-1.62463e-21	2.19133e-20	4.88453e-18	1.02436e-16	-5.97155e-15	-2.60668e-13	5.82239e-12	4.32925e-10	-1.28928e-08	-1.26833e-06	5.02052e-05	0.00741859	0.550436	44.2407
		κ2 =	6.28417e-14
		κ3 =	4.25549e-12
		κ4 =	1.44317e-10			Table IV. Tref(P)
		κ5 =	6.51063e-09			Coefficient	β20	β19	β18	β17	β16	β15	β14	β13	β12	β11	β10	β9	β8	β7	β6	β5	β4	β3	β2	β1	β0
		κ6 =	7.47004e-07			value	1.23251e-33	-1.07214e-30	4.01991e-28	-8.17644e-26	8.70783e-24	-1.63591e-22	-8.04568e-20	9.54108e-18	9.37245e-18	-1.18292e-13	1.61178e-11	-1.25297e-09	6.61282e-08	-2.48662e-06	6.73841e-05	-0.00130992	0.0180869	-0.175753	1.1803	-7.51413	56.3684
		κ7 =	7.46274e-05
		κ8 =	0.00328307
		κ9 =	0.346387
		κ10 =	50.5237
	2) Compute Tref (P)
		Tref =	-97.5724
	4) Compute θw(Tref)
		θw =	9.99872
